# Supplementary material
Source: publisher site journal article supplement (https://www.dovepress.com/article/479025)
Supplement: Supplementary file 1 [file get_supplementary_file.php]

**Supplementary Table 1** **Postoperative Complications(** **n%)**

|  | TLTG | LATG | P |
| --- | --- | --- | --- |
| Anastomosis leakage | 1 | 2 | <0.001 |
| Delayed emptying | 1 | 3 |  |
| Anastomosis stenosis | 0 | 1 |  |
| Wound infection | 0 | 1 |  |

**TLTG**: totally laparoscopic total gastrectomy; **LATG**: laparoscopy-assisted total gastrectomy
